# Supplementary material for: A novel synthetic approach for designing metal-free, redox-active quinoxaline-benzimidazole-based organic polymers with high energy storage capacity
Source: Royal Society of Chemistry journal article supplement (doi:10.1039/c9nj02877c), 2019-01-01
Supplement: c9nj02877c1.pdf [file c9nj02877c1.pdf]

## Supporting Information

### Novel synthetic approach for designing metal free, redox active quinoxaline-benzimidazole based organic polymers with high energy storage capacity.

**Pravin S. Salunkhe,<sup>a,c</sup> Yuvraj S. Patil,<sup>a</sup> Indrajeet A. Dhole,<sup>b</sup> Basavraj S. Kalshetti,<sup>a</sup> Vikas B. Patil,<sup>b</sup> Shivshankar R. Mane,<sup>c</sup> and Anil A. Ghanwat<sup>a\*</sup>**

*a. Polymer Research Laboratory, School of Chemical Sciences, Solapur University, Solapur-413255, (MS), India.*

*b. Functional Materials Research Laboratory, School of Physical Sciences, Solapur University, Solapur-413255, (MS), India.*

*c. Polymer Science and Engineering Division, CSIR-National Chemical Laboratory, Pune*

E-mail : [anil\\_ghanwat@yahoo.com](mailto:anil_ghanwat@yahoo.com)

[ph.salunkhe@ncl.res.in](mailto:ph.salunkhe@ncl.res.in)

| Section | Content                                                                                       | Page No. |
|---------|-----------------------------------------------------------------------------------------------|----------|
| S-1     | Experimental                                                                                  | 1.       |
| S-2     | <sup>1</sup> H NMR of Polymer                                                                 | 3.       |
| S-3     | Energy Dispersive X-ray Spectroscopy (EDX)                                                    | 3.       |
| S-4     | Electrochemical Analysis                                                                      | 4.       |
| S-5     | NLDFT study of QOP and QOP-BOP                                                                | 6.       |
| S-6     | Comparative study of electrochemical charge storage activity of different electrode materials | 7.       |
| S-7     | References                                                                                    | 8.       |

## Section S-1:

### Experimental

M-cresol, selenium dioxide and dichloromethane (s. d. fine Bombay) were purified. Phenylacetyl chloride, biphenyl dicarboxylic acid (BPDA) and 3, 3' Diamino benzidine (Sigma Aldrich) were used as received. The inherent viscosities of QOP and QOP-BOP were measured with 3 % concentration in m-cresol at 30 °C using Ubbelohde suspended level viscometer. The chemical structure of intermediates, monomer and polymers were recorded on a Thermo Nicoletis-10 Mid Fourier transform infrared spectrometer. Proton NMR of monomer and polymer were obtained with a Bruker spectrophotometer. X-ray diffraction of polymers was recorded on Rigaku X-ray Diffraction System. Thermogravimetric analysis was performed on a Mettler Toledo Thermal Analysis system under nitrogen atmosphere with a scan rate of 10°C min<sup>-1</sup>. Differential Scanning Calorimetry was performed on a Mettler Toledo DSC at a heating rate of 10°C min<sup>-1</sup>. The scanning electron micrograph of the sample was taken with the help of JSM5910 Scanning Electron Microscope, JEOL, Japan. Cyclic Voltammogram measurements was carried out with a CHI 608E Electrochemical Analyzer (CH Instruments Inc., USA) with polymer coated on stainless steel plate was taken as anode, platinum wire as cathode and the reference electrode was a saturated calomel electrode. Experiments were performed in 1M Na<sub>2</sub>SO<sub>4</sub> solutions as an electrolyte and measured at a potential scan rate of 2-100mV/s.

## Section S-2:

### <sup>1</sup>H NMR of Polymer

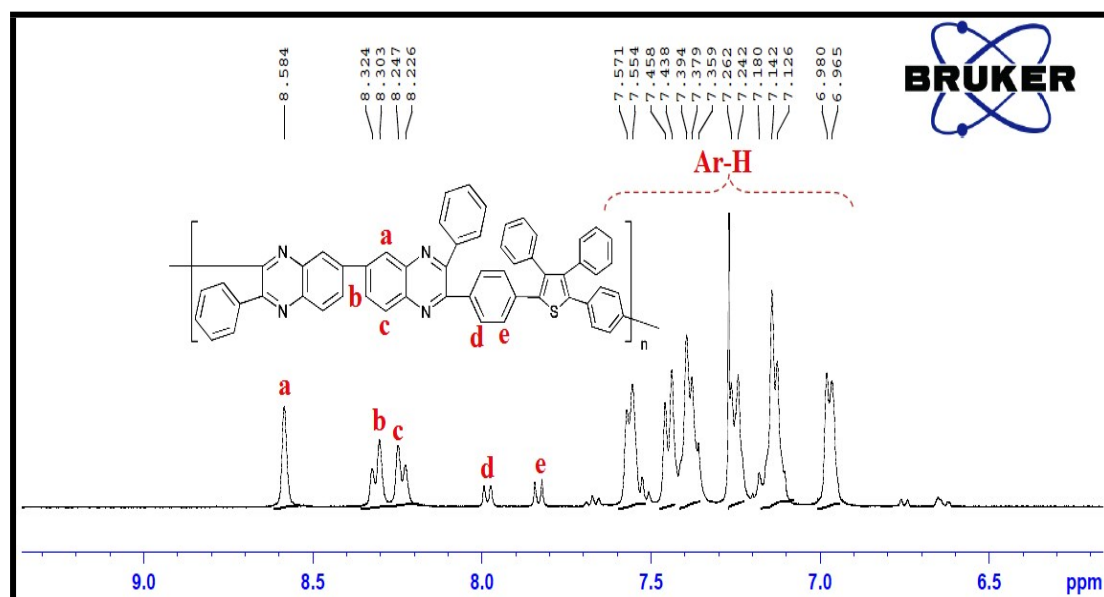

Figure S-1: <sup>1</sup>H NMR of QOP.

### Section S-3: Energy Dispersive X-ray Spectroscopy (EDX)

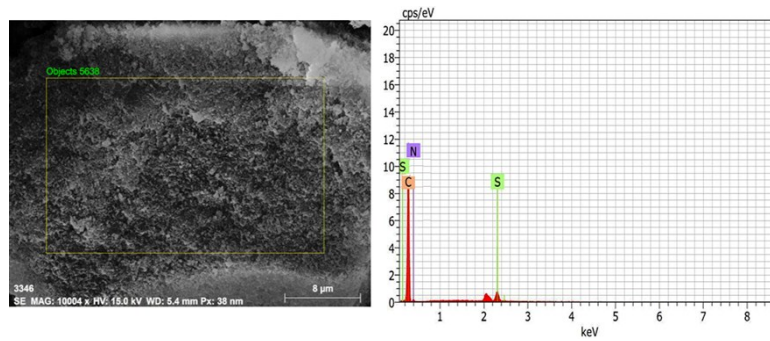

Figure S-2: Energy Dispersive X-ray Spectroscopy (EDX) of copolymer QOP-BOP.

### Section S-4: Electrochemical Analysis

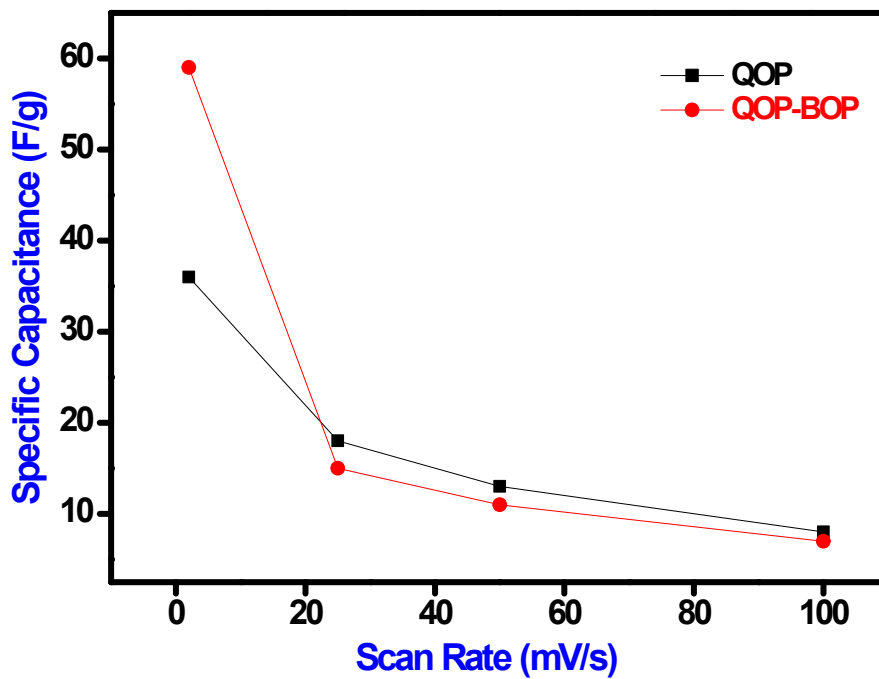

Figure S-3: Variation of scan rate Vs specific capacitance.

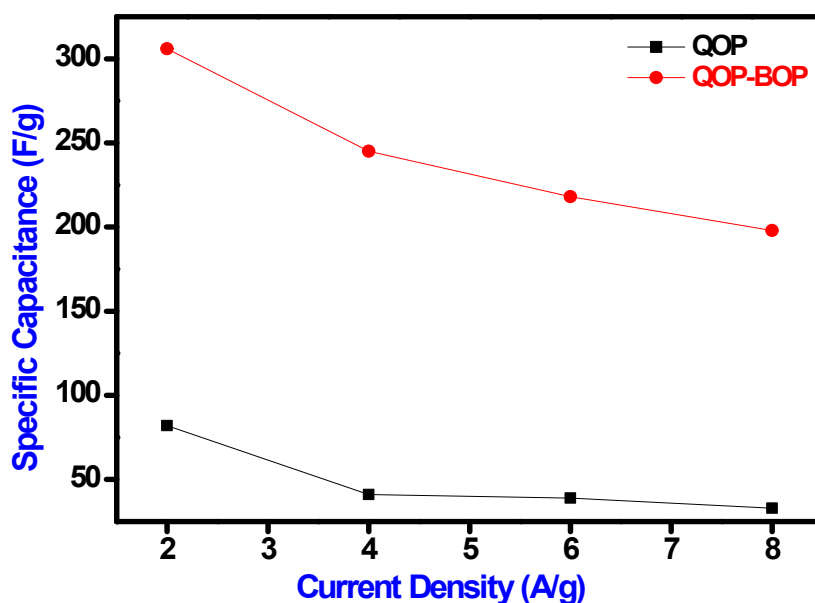

Figure S-5: Variation of current density Vs specific capacitance.

### Calculations

The electrical parameters such as specific energy, specific power and columbic efficiency of QOP and QOP-BOP electrodes calculated using following formulae:

$$\text{Specific energy} = V \times I_d \times T_d / W \quad (1)$$

$$\text{Specific power} = V \times I_d / W \quad (2)$$

$$\text{Columbic efficiency } \eta (\%) = T_d / T_c \times 100 \quad (3)$$

Where, V is the applied potential, W is the mass of electrode dipped in the electrolyte,  $I_d$  is discharging current,  $T_d$  is discharging time and  $T_c$  is charging time. It is found that QOP electrode has the specific energy of 70.90 Wh/kg, specific power of 31.66 KW/kg and columbic efficiency 75 %. Similarly QOP-BOP electrode has the specific energy of 92.40 Wh/kg, specific power of 11.00 KW/kg and columbic efficiency 65 % at 1mA current density in 1M  $\text{Na}_2\text{SO}_4$  electrolyte solution.

**Table S-1. Parameter values by fitting the impedance data of QOP and QOP-BOPfilmt to equivalent circuit shown in main manuscript figure 4.**

| Parameters | QOP | QOP-BOP |
|------------|-----|---------|
| Components |     |         |

|                       |                       |                       |
|-----------------------|-----------------------|-----------------------|
| R                     | 3.406                 | 5.66                  |
| Cdl/mFg <sup>-1</sup> | 2.01x10 <sup>-4</sup> | 2.04x10 <sup>-4</sup> |
| R <sub>1</sub> /k.ohm | 233.2                 | 256.2                 |
| R <sub>2</sub> /k.ohm | 1228                  | 1244                  |
| W/mS s <sup>-n</sup>  | 0.00139               | 0.00152               |
| CPE                   | 2.99X10 <sup>-4</sup> | 2.99X10 <sup>-4</sup> |

### Section S-5. NLDFIT study of QOP and QOP-BOP

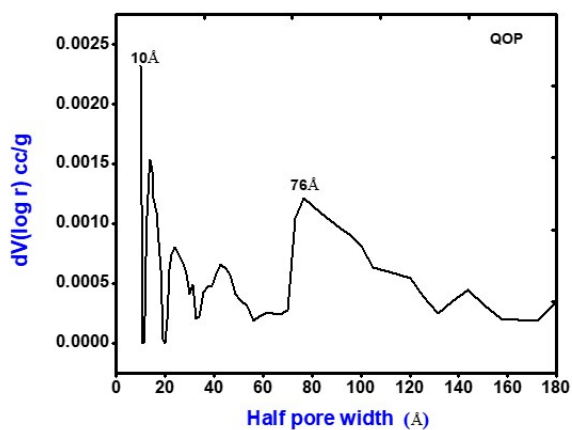

DFT method summary

Pore volume = 0.100 cc/g  
 Lower confidence limit = 10.104 Å  
 Fitting error = 0.734 %  
 Half pore width (Mode) = 10.104 Å

Moving point average: off

DFT method summary

Pore volume = 0.100 cc/g  
 Lower confidence limit = 10.104 Å  
 Fitting error = 0.734 %  
 Half pore width (Mode(dLog)) = 76.550 Å

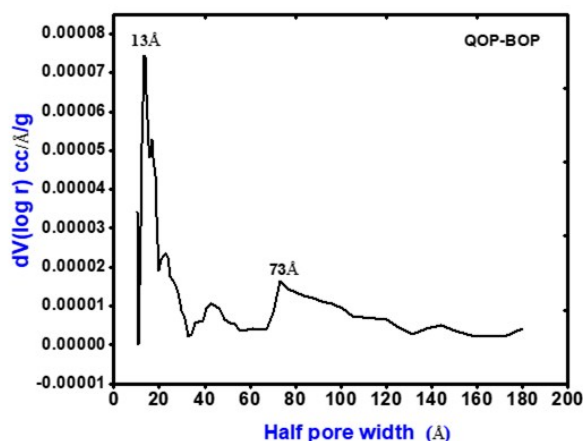

DFT method summary

Pore volume = 0.002 cc/g  
 Lower confidence limit = 10.104 Å  
 Fitting error = 0.536 %  
 Half pore width (Mode) = 13.236 Å

Moving point average: off

DFT method summary

Pore volume = 0.002 cc/g  
 Lower confidence limit = 10.104 Å  
 Fitting error = 0.536 %  
 Half pore width (Mode(dLog)) = 73.182 Å

Moving point average: off

**Figure S-6:** Pore size distribution curve for QOP and QOP-BOP derived from N<sub>2</sub> adsorption isotherm at 77 K using the NLDFT method.

## Section S-6. Comparative study of electrochemical charge storage activity of different electrode materials

**Table S-2.**

| Electrode Material                                                 | Electrolyte                                                                                 | Specific capacitance (F/ g)        | Current density (A g <sup>-1</sup> ) | Reference |
|--------------------------------------------------------------------|---------------------------------------------------------------------------------------------|------------------------------------|--------------------------------------|-----------|
| azo based covalent organic frameworks (COFs)                       | 1 M Na <sub>2</sub> SO <sub>4</sub>                                                         | 226                                |                                      | 1         |
| Porous triazine-based frameworks (PTF)                             | 1-ethyl-3-methylimidazolium Tetrafluoroborate                                               | 147 (PTF@500°C)<br>151(PTF@700 °C) | 0.1                                  | 2         |
| Graphene                                                           | 30 wt.% KOH                                                                                 | 150                                | 0.1                                  | 3         |
| Radical COFs<br>(i)[TEMPO]100 %-NiP-COF<br>(ii) [TEMPO]50%-NiP-COF | 0.1 M (C <sub>4</sub> H <sub>9</sub> ) <sub>4</sub> NCIO <sub>4</sub> in CH <sub>3</sub> CN | (i)167<br>(ii) 124                 | 0.1                                  | 4         |
| Hierarchically porous B doped carbons                              | 1 M H <sub>2</sub> SO <sub>4</sub>                                                          | 160                                | 10 mV/s                              | 5         |

|                                                            |                                               |            |          |                     |
|------------------------------------------------------------|-----------------------------------------------|------------|----------|---------------------|
| Nitrogen-doped porous carbon foam                          | 6 M KOH                                       | 210        | 0.5      | 6                   |
| Hierarchically porous carbon AS-ZC-800                     | 1 M H <sub>2</sub> SO <sub>4</sub>            | 251        | 0.25     | 7                   |
| MOF-derived nonporous carbons                              | 1 M H <sub>2</sub> SO <sub>4</sub>            | 251        | 0.5      | 8                   |
| Interconnected micropores Carbon                           | 1 M H <sub>2</sub> SO <sub>4</sub>            | 258        | 0.5      | 9                   |
| TpDAB                                                      | 1M Na <sub>2</sub> SO <sub>4</sub>            | 432        | 0.5      | 10                  |
| PAM                                                        | 1M NaOH                                       | 252        | 5 mV/s   | 11                  |
| $\beta$ -ketoenamine-linked conjugated microporous polymer | 1M H <sub>2</sub> SO <sub>4</sub>             | 252        | 1        | 12                  |
| Reduced graphene oxide hydrogels                           | 1 M H <sub>2</sub> SO <sub>4</sub> + 0.2 M HQ | 252.6      | 1        | 13                  |
| N-rich hollow carbon sphere                                | 5 M KOH                                       | 230        | 0.5      | 14                  |
| MnO <sub>2</sub> /CNT                                      | 1 M Na <sub>2</sub> SO <sub>4</sub>           | 201        | 1        | 15                  |
| <b>QOP-BOP</b>                                             | <b>1M Na<sub>2</sub>SO<sub>4</sub></b>        | <b>305</b> | <b>2</b> | <b>Present Work</b> |

## Section S-7.

### References:

1. Pumin Sun., *RSC Adv.*, **2015**, 5, 27290
2. L. Hao, J. Ning, B. Luo, B. Wang, Y. Zhang, Z. Tang, J. Yang, A. Thomas and L. Zhi., *J. Am. Chem. Soc.*, **2015**, 137, 219-225.
3. X. Du, P. Guo, H. Song and X. Chen, *Electrochem. Acta.*, **2010**, 55, 4812.
4. F. Xu, H. Xu, X. Chen, D. Wu, Y. Wu, H. Liu, C. Gu, R. Fu and D. Jiang. **2015**, 54, 6814-6818.
5. Y. Huang, P. Pachfule, J. Sun and Q. Xu, *J. Mater. Chem. A.*, **2016**, 4, 4273-4279.
6. B. Liu, L. Zhang, P. Qi, M. Zhu, G. Wang, Y. Ma, X. Guo, H. Chen, B. Zhang, Z. Zhao, B. Dai and F. Yu, *Nanomaterials.*, **2016**, 6, 18.
7. A. Amali, J. Sun, Q. Xu., *Chem. Commun.* 2014, **50**, 1519.
8. R. Salunkhe, Y. Kamachi, N. Torad, S. Hwang, Z. Sun, S. Dou, J. Kim, Yarmouth, *J. Mater. Chem. A*, **2014**, 2, 19848-19854.

9. D. Puthusseri, V. Aravindan, S. Madhavi and S. Ogale, *Energy Environ. Sci.*, **2014**, 7, 728-735.
10. C. Bidhan Patra, K. Santimoy, S. Lanka, P. Debabrata and B. Asim, *Chem. Commun.*, **2016**, 52, 7592-7595.
11. P. Salunkhe, Y. Patil, V. Patil, Y. Navale, I. Dhole, V. Ubale, N. Maldar and A. Ghanwat, *Journal of Polymer Research* **2018**, 25, 147.
12. S. Chai, N. Hu, Y. Han, X. Zhang, Z. Yang, L. Wei, H. Wei, *RSC Adv.* **2016**, 6, 49425-49428.
13. V. H. Pham, T. Gebre, J. H. Dickerson, *Nanoscale*, **2015**, 7, 5947-5950.
14. X. Liu, L. Zhou, Y. Zhao, L. Bian, X. Feng, Q. Pu, *ACS Appl. Mater. Interfaces*, **2013**, 5, 10280-10287.
15. L. Li, Z. A. Hu, N. An, Y. Y. Yang, Z. M. Li, H. Y. Wu, *J. Phys. Chem. C.* **2014**, 118, 22865-22872.
